# Supplementary material for: Chemical catalytic degradation of organic pollutants by using Ag–Cu2O core–shell decorated on rGO
Source: Royal Society of Chemistry journal article supplement (doi:10.1039/d4ce00644e), 2024-01-01
Supplement: d4ce00644e1.pdf [file d4ce00644e1.pdf]

## Supporting Information

### **Chemical catalytic degradation of the organic pollutant by using the Ag-Cu<sub>2</sub>O core-shell decorated on rGO**

Lei Chen<sup>1</sup>, Shuang Guo<sup>2</sup>, Eungyeong Park<sup>3</sup>, Hongkai Zhao<sup>1,2,\*</sup>, Young Mee Jung<sup>2,3,\*</sup>

<sup>1</sup> School of Materials Science and Engineering, Jilin Jianzhu University, Changchun 130118, China.

<sup>2</sup> Department of Chemistry, Institute for Molecular Science and Fusion Technology, Kangwon National University, Chuncheon 24341, Korea.

<sup>3</sup> Kangwon Radiation Convergence Research Support Center, Kangwon National University, Chuncheon 24341, Korea.

\* Correspondence: [hkzhao003@126.com](mailto:hkzhao003@126.com) (H. Zhao); [ymjung@kangwon.ac.kr](mailto:ymjung@kangwon.ac.kr) (Y.M. Jung)

## **Experimental section**

### **Materials**

Silver nitrate ( $\text{AgNO}_3$ ), trisodium citrate dihydrate ( $\text{Na}_3\text{C}_6\text{H}_5\text{O}_7 \cdot 2\text{H}_2\text{O}$ ), polyvinylpyrrolidone (PVP, K30), trihydrate copper (II) nitrate ( $\text{Cu}(\text{NO}_3)_2 \cdot 3\text{H}_2\text{O}$ ), hydrazine hydrate ( $\text{N}_2\text{H}_4 \cdot \text{H}_2\text{O}$ , 85%), 4-nitrophenol (4-NP), trinitrophenol (TNP) sodium borohydride ( $\text{NaBH}_4$ ), and trichlorogold hydrochloride hydrate ( $\text{HAuCl}_4 \cdot 4\text{H}_2\text{O}$ ) were purchased from Sinopharm Chemical Reagent Co., Ltd. All chemicals were used without further purification. Deionized water ( $18 \text{ M}\Omega \cdot \text{cm}$ ) was used throughout the experiments.

### **Fabrication of the Ag-rGO composite**

First, 2 mg of graphene oxide (GO) was dispersed in 200 mL of deionized water and sonicated for 1 hour to obtain a uniformly dispersed GO aqueous solution in a three-necked flask. Then, 36 mg of  $\text{AgNO}_3$  was added to the three-necked flask and magnetically stirred at 90-92 °C until slight boiling occurred. Finally, 4 mL of 1%  $\text{Na}_3\text{C}_6\text{H}_5\text{O}_7 \cdot 2\text{H}_2\text{O}$  solution was added to the three-necked flask, and the temperature was adjusted to 85 °C. The development of a dark green color in the solution indicated that the Ag-rGO composite had been obtained.

### **Fabrication of ACR nanocomposites**

The ACR nanocomposites were obtained by reducing  $\text{Cu}(\text{NO}_3)_2 \cdot 3\text{H}_2\text{O}$  with a reducing agent in a 35%  $\text{N}_2\text{H}_4 \cdot \text{H}_2\text{O}$  solution using PVP as a polymerization agent. One gram of PVP was added to 50 mL of 0.05 M  $\text{Cu}(\text{NO}_3)_2 \cdot 3\text{H}_2\text{O}$  with vigorous stirring. After PVP was completely dissolved (approximately 10 min), V mL of Ag-rGO composite was

added ( $V=0, 5, 10,$  and  $15$  mL). Then,  $70\ \mu\text{L}$  of  $\text{N}_2\text{H}_4\cdot\text{H}_2\text{O}$  was added to the mixed solution for  $90$  s under magnetic stirring ( $350$  rpm). The obtained ACR nanocomposites with different  $\text{Cu}_2\text{O}$  shells are shown in Fig. 1.

### **Catalytic performance evaluation**

We added  $100\ \mu\text{L}$  of  $0.005$  M 4-NP solution to  $2$  mL of deionized water and placed it in a quartz dish. Then, we added a freshly prepared  $0.2$  M  $\text{NaBH}_4$  solution. The solution changed from colorless to light yellow. Afterward, different volumes of Ag-rGO composite solution were used to fabricate the ACR nanocomposites. Finally, the UV–Vis absorption spectra were measured in the range of  $200$ – $500$  nm every  $2$  min. The catalytic performance of the core-shell structure was evaluated from the reduction rate of 4-NP. The optimized ACR nanocomposites were used as catalysts for the degradation of MO and TNP.

### **Characterization**

Field emission scanning electron microscopy (SEM) and transmission electron microscopy (TEM) images were obtained using a JEOL JSM-6500F (JEOL Ltd., Tokyo, Japan) and a JEOL 2100 (JEOL Ltd., Tokyo, Japan) at an acceleration voltage of  $200$  kV. The UV–Vis absorption spectra and catalytic properties were monitored using a SHIMADZU 3600 spectrometer (Shimadzu Corporation, Tokyo, Japan).

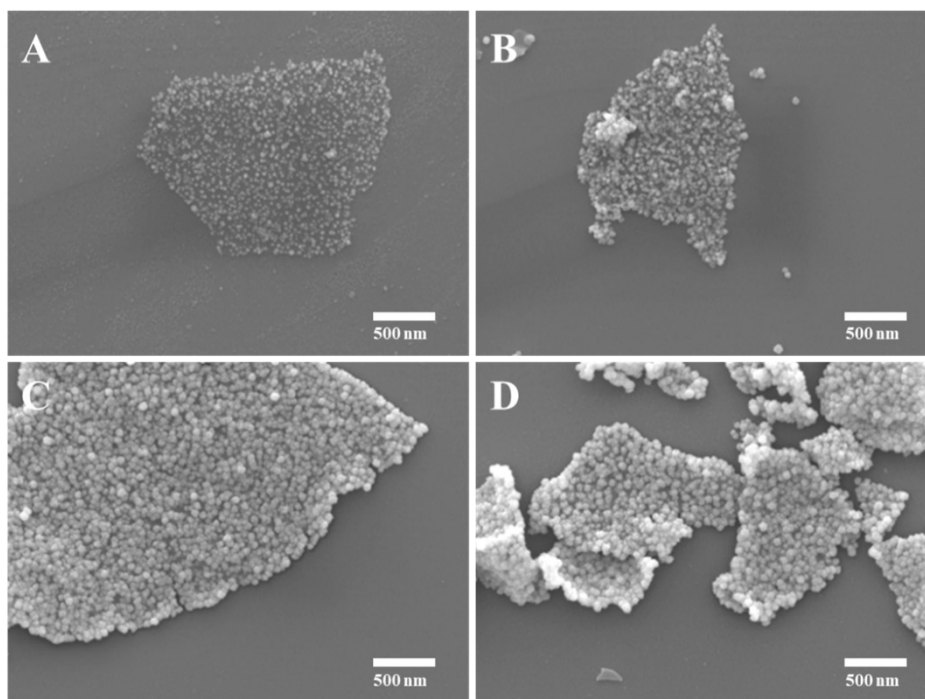

**Fig. S1.** SEM images of Ag-rGO (A) and ACRN with different thicknesses of the Cu<sub>2</sub>O shell (B-D).

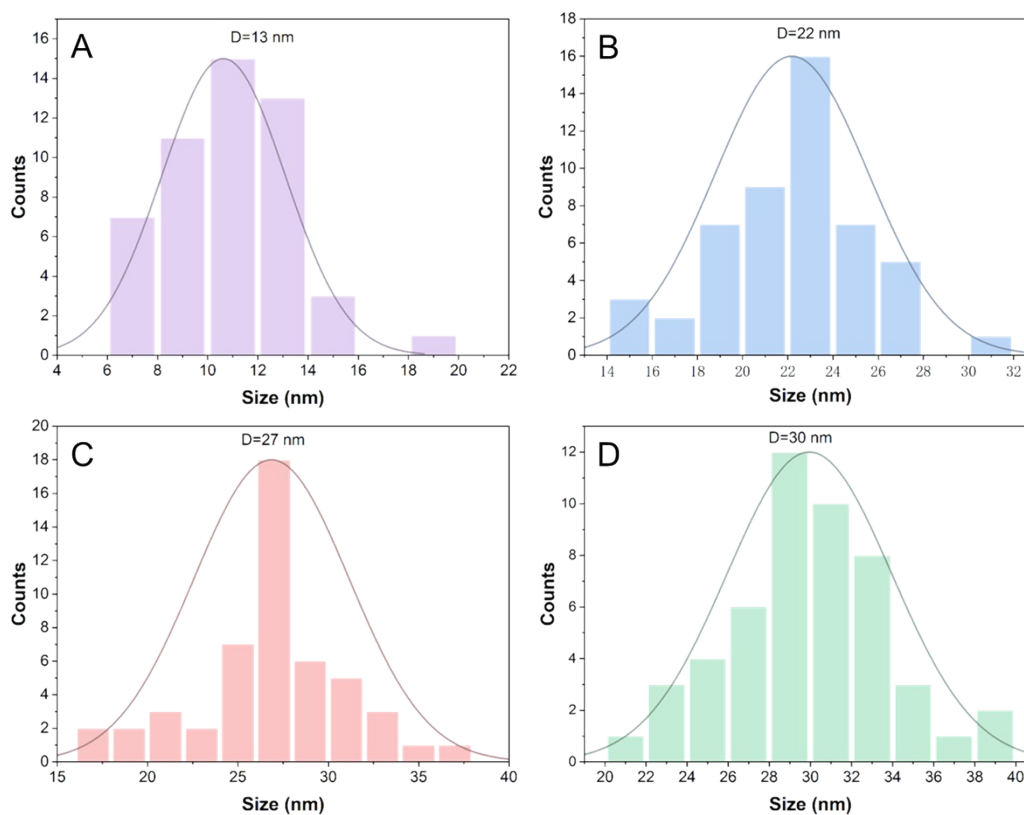

**Fig. S2.** The column charts of the average diameter of the Ag nanoparticles (A) and Ag@Cu<sub>2</sub>O which decorated on the rGO (B-D).
